# Supplementary material
Source: publisher figshare collection journal article supplement (https://karger.figshare.com/ndownloader/files/17497112)
Supplement: Supplementary file 1 [file 17497112]

**Figure legend:**
**Photos 1 and 2**: Women with metabolic syndrome and acne scars on facial region.
